# Supplementary material for: Facile generation of thenil and furil based blue emitters for the fabrication of non-doped and solution-processed light-emitting electrochemical cells
Source: Royal Society of Chemistry journal article supplement (doi:10.1039/d1tc05542a), 2022-01-01
Supplement: d1tc05542a1.pdf [file d1tc05542a1.pdf]

# Facile Generation of Thenil and Furiil Based Blue Emitters for Fabrication of Non-Doped and Solution-Processed Light-Emitting Electrochemical Cells

Archana Puthanveedu,<sup>a</sup> Kanagaraj Shanmugasundaram,<sup>a</sup> Sunghyun Yoon,<sup>a</sup> Youngson Choe<sup>a\*</sup>

<sup>a</sup>School of Chemical and Biomolecular Engineering, Pusan National University, Busan 609-735,  
Republic of Korea.

## SUPPORTING INFORMATION

### Table of Contents

|                                                                              |    |
|------------------------------------------------------------------------------|----|
| Materials and methods.                                                       | 2  |
| <sup>1</sup> H NMR spectrum.                                                 | 4  |
| MALDI-TOF mass spectrum.                                                     | 5  |
| Optimized electronic structures.                                             | 6  |
| Computational ground state geometry                                          | 6  |
| DSC thermograms of target compounds.                                         | 17 |
| Luminescence vs EQE plot                                                     | 18 |
| Luminescence vs Voltage of <b>ThAm</b> and <b>FuAm</b> (repetitive scan)     | 19 |
| Current Density vs Voltage of <b>ThAm</b> and <b>FuAm</b> (repetitive scan). | 20 |

## Materials and methods

All the chemicals, reagents and solvents used were purchased from Sigma-Aldrich and TokyoChemical Industries and are used without further purifications. All reactions were carried out under an inert Argon atmosphere. The  $^1\text{H}$  NMR spectra for the synthesized compounds were acquired using Varian Unity Inova 500 MHz FT-NMR Spectrometer in DMSO-  $d_6$  and  $\text{CDCl}_3$  with tetramethyl silane (TMS) as the internal standard. The high-resolution mass spectra was recorded using fast atom bombardment (FAB) Tandem Atom Spectrometer MS/MS system. The UV-Vis absorption spectra of both compounds were obtained using 8453 UV-vis Agilent spectrophotometer. The photoluminescence (PL) spectra for both solution as well as thin films were recorded using an F-7000 FL spectrophotometer. To determine the thermal stability of the organic compounds, thermogravimetric analysis (TGA) was carried out using Netzsch TG 209 instrument under nitrogen atmosphere at  $20\text{ }^\circ\text{C min}^{-1}$  heating rate and differential scanning calorimetry (DSC) using TA Instruments Q200 at  $10\text{ }^\circ\text{C min}^{-1}$  heating rate. From the second heating scan  $T_g$  was determined. The cyclic voltammetric analysis was carried out with a concentration of  $10^{-3}\text{ M}$  of the two compounds in dichloromethane solvent using supporting electrolyte  $0.1\text{ M}$  tetra n-butylammonium hexafluorophosphate ( $\text{TBAPF}_6$ ) at a scan rate of  $100\text{ mV s}^{-1}$ . CV model of potentiostat/galvanostat (Iviumstat) voltammetric analyser was employed with Ag/AgCl as the reference electrode, Platinum wire as counter electrode and Platinum as the working electrode. The potential values were measured with respect to the ferrocenium/ferrocene ( $\text{Fc}^+/\text{Fc}$ ) as the internal standard.

## **Fabrication and LEC Device Characterization**

Glass substrates coated with Indium tin oxide (ITO) were procured from AMG Korea Co. The validation of all the LEC devices fabricated were done and the resistance of the ITO substrate was found to be  $15 \Omega$  ohm/sq. The hole injection layer which consists of Poly(3,4-ethylenedioxythiophene): poly (styrene sulfonate) (PEDOT: PSS), the buffer layer, was purchased from H.C. Starck Clevios (PVP AI 4083) Aluminum, which serves as the cathode material, was procured from CERAC, Inc. Initially, the Glass substrate coated with ITO substrate was washed with a solution containing a mixture of acetone, ethanol, and isopropanol in an ultrasonic bath. Later on, this was exposed to ozone treatment for a time gap of 30 min in order to improve the hole injection and also to remove the plausible organic residue if present. At first, PEDOT: PSS was spin-coated onto the ITO substrate at 2000 rpm for 20 s to form a layer of 50 nm thickness and then was dried at a temperature of 120 °C for 1 h in a vacuum oven. Prior to coating, PEDOT: PSS was filtered using a hydrophilic (0.2  $\mu\text{m}$ ) PTFE filter from its aqueous dispersion. PEDOT: PSS acts as a hole-injecting material which reduces short contacts by forming a smooth uniform layer over ITO. The emissive layer solution is composed of 10 mg of compounds in 1mL of acetonitrile. Before coating the active layer, the emissive layer solutions were filtered using a hydrophobic PTFE filter (0.1  $\mu\text{m}$ ). This coated active layer (80 nm) was exposed to thermal evaporation under high vacuum which contains a metal evaporating chamber for aluminum (cathode) deposition using a shadow mask. The final structural configuration obtained was ITO/PEDOT: PSS/active layer/Al. Keithley characterization systems were used to measure the electroluminescent properties of the fabricated devices under ambient conditions.

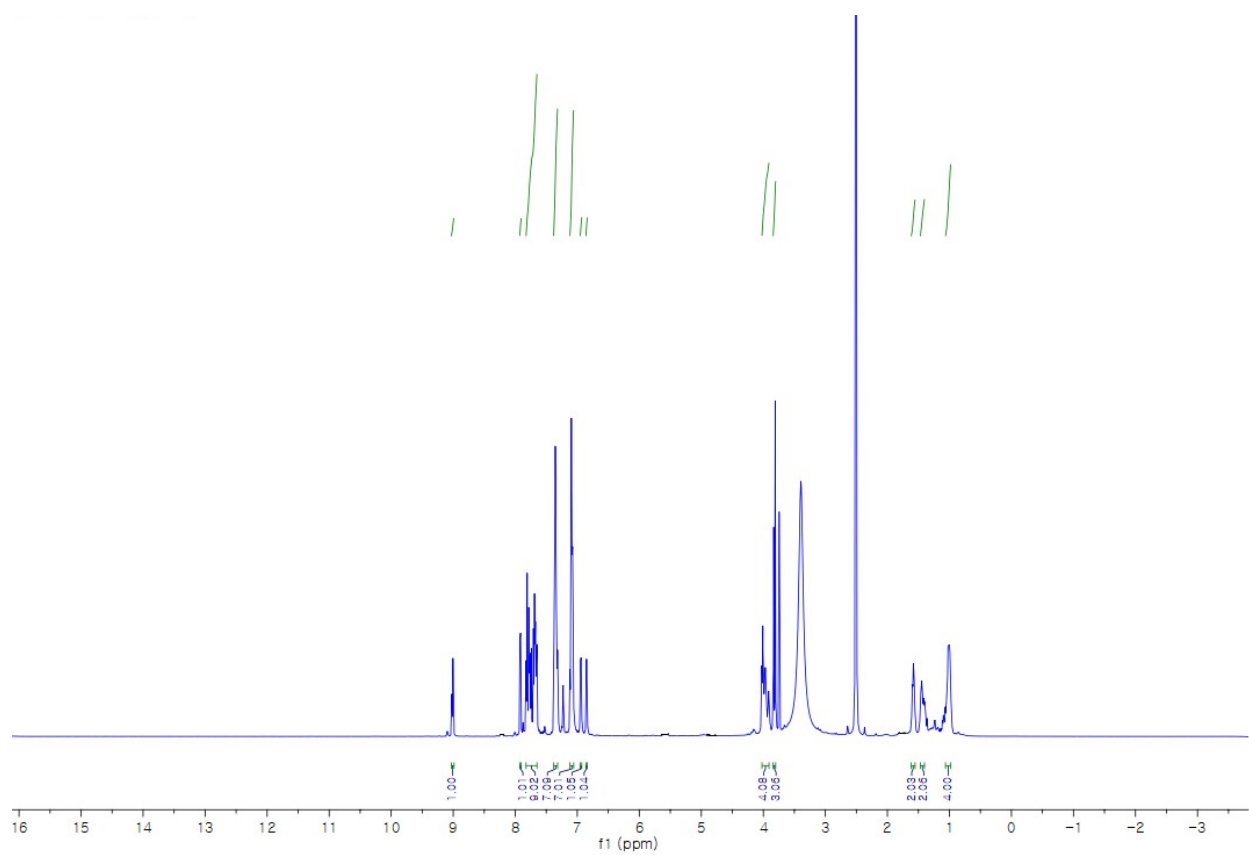

**Fig. S1.**  $^1\text{H}$  NMR Spectra of **FuAm**.

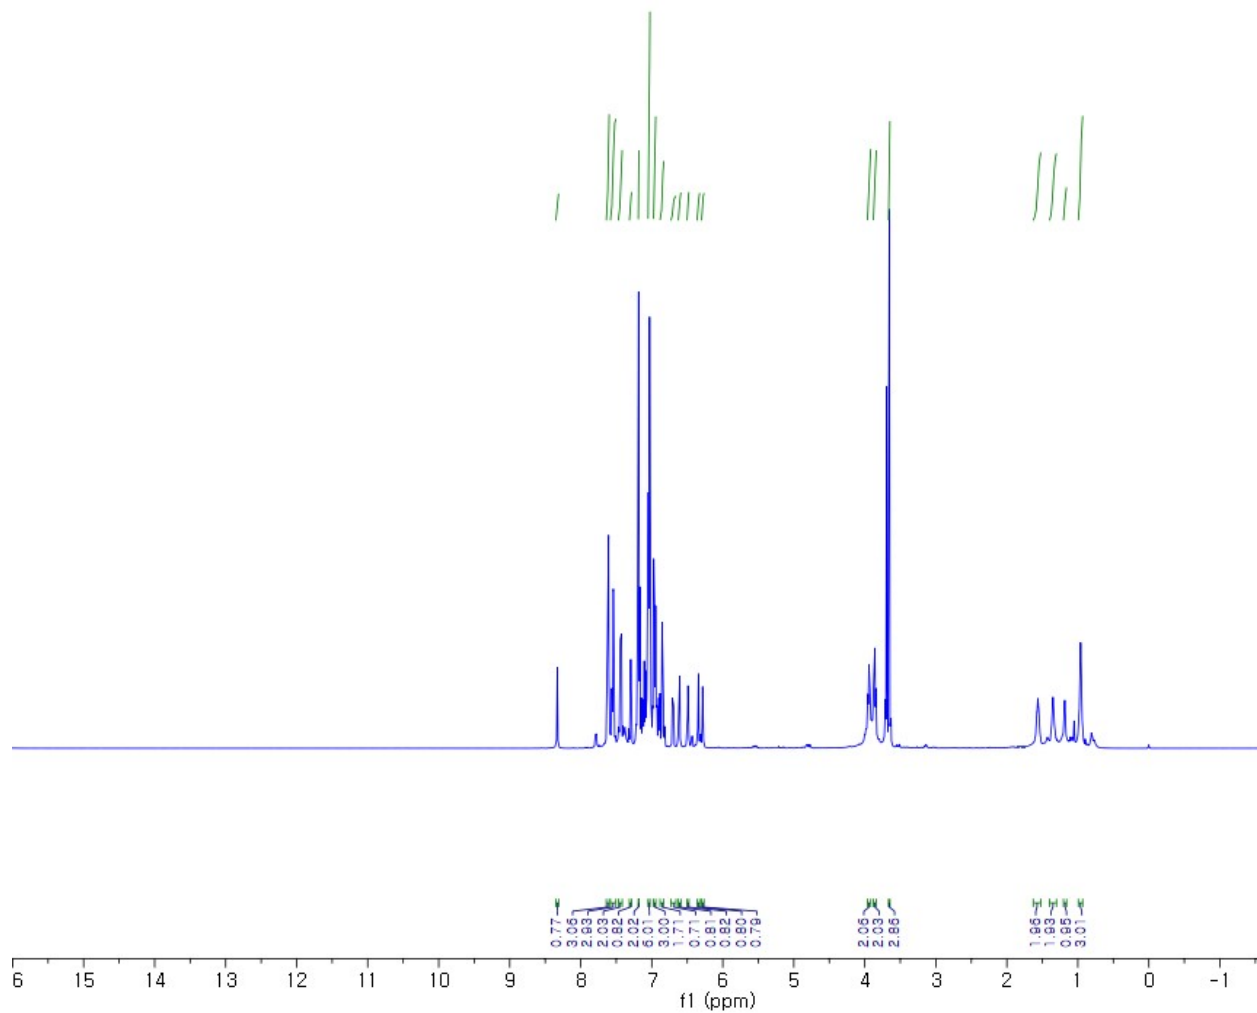

**Fig. S2.**  $^1\text{H}$  NMR Spectra of ThAm

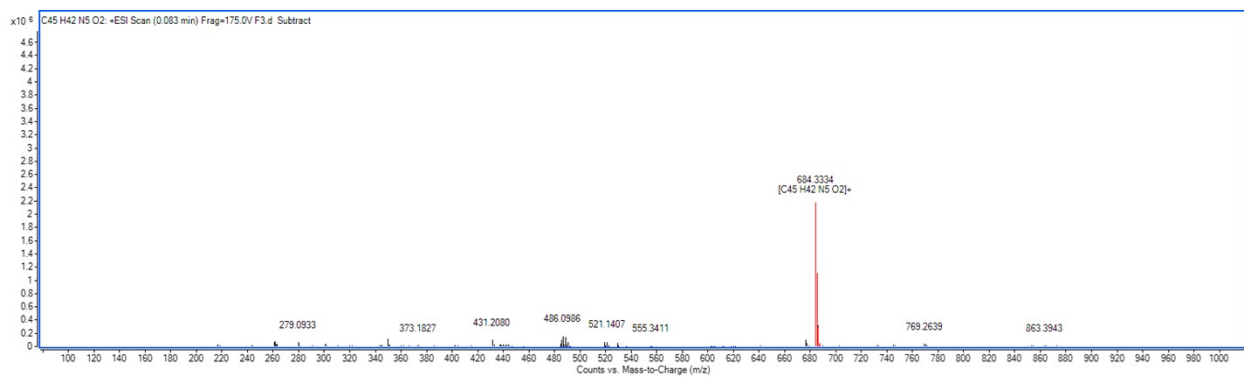

**Fig. S4.** Mass Spectra of FuAm.

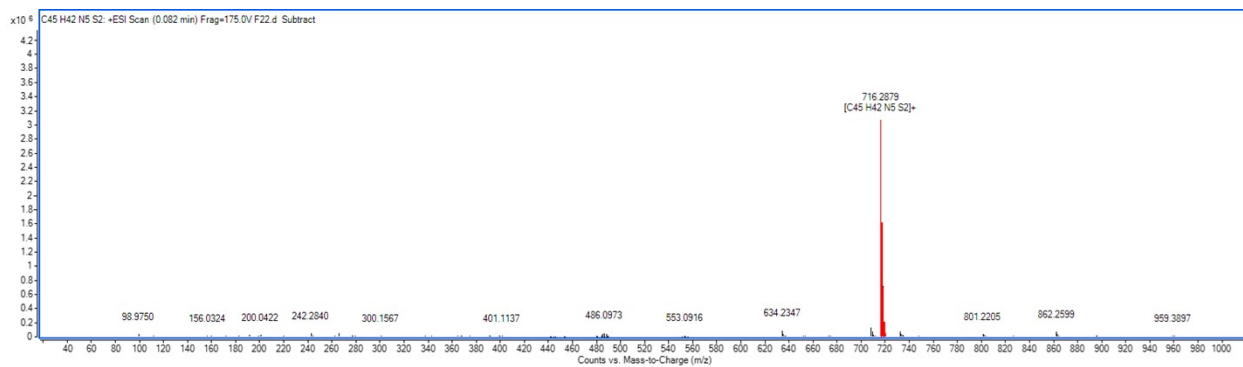

**Fig. S4.** Mass Spectra of **ThAm**.

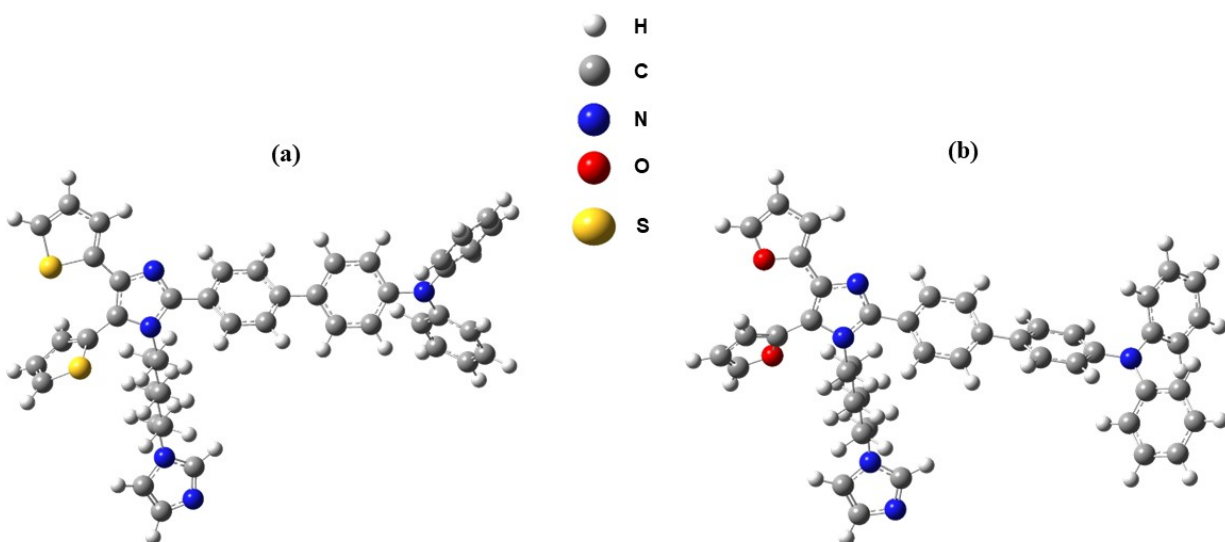

**Fig. S5.** Optimised electronic structures of the target compounds **ThAm** (a) and **FuAm** (b).

Computational ground state geometry of **FuAm** using B3LYP/6-31G (d,p) basis set of Gaussian 09 program set.

|   |          |          |          |
|---|----------|----------|----------|
| C | -2.05994 | -0.76711 | 1.414079 |
| C | -1.6589  | 0.330019 | 0.651297 |
| N | -0.35065 | 0.039326 | 0.260311 |
| N | -1.03615 | -1.6832  | 1.501409 |
| C | -0.0268  | -1.17821 | 0.81059  |

|   |          |          |          |
|---|----------|----------|----------|
| C | 1.286304 | -1.83615 | 0.68538  |
| C | 1.913984 | -2.04259 | -0.55336 |
| C | 1.918056 | -2.31807 | 1.842982 |
| C | 3.150388 | -2.67774 | -0.62609 |
| H | 1.425869 | -1.72283 | -1.46869 |
| C | 3.148875 | -2.96154 | 1.766077 |
| H | 1.427614 | -2.1881  | 2.802253 |
| C | 3.798287 | -3.14642 | 0.531156 |
| H | 3.625602 | -2.80022 | -1.59438 |
| H | 3.605251 | -3.3436  | 2.674041 |
| C | 0.57782  | 0.96488  | -0.40038 |
| C | 1.388288 | 1.782519 | 0.609192 |
| H | -0.00562 | 1.617796 | -1.04996 |
| H | 1.245987 | 0.38456  | -1.03573 |
| C | 2.330539 | 2.770741 | -0.08377 |
| H | 0.694758 | 2.320104 | 1.264196 |
| H | 1.963945 | 1.092303 | 1.238738 |
| C | 3.170799 | 3.582358 | 0.908373 |
| H | 2.998931 | 2.226526 | -0.76539 |
| H | 1.742473 | 3.456411 | -0.70945 |
| H | 2.502762 | 4.126995 | 1.589848 |
| H | 3.755942 | 2.895261 | 1.535118 |
| C | 4.114234 | 4.571813 | 0.217086 |
| H | 3.53674  | 5.267898 | -0.40409 |
| H | 4.793414 | 4.036078 | -0.45784 |
| C | 5.116194 | -3.81661 | 0.452377 |
| C | 5.452241 | -4.64581 | -0.63312 |
| C | 6.081879 | -3.64697 | 1.46103  |
| C | 6.686004 | -5.28184 | -0.70692 |
| H | 4.720979 | -4.83023 | -1.4144  |
| C | 7.324779 | -4.26513 | 1.388598 |
| H | 5.873056 | -2.98774 | 2.298314 |
| C | 7.64623  | -5.09788 | 0.302927 |
| H | 6.910408 | -5.93341 | -1.54448 |
| H | 8.058635 | -4.09939 | 2.169873 |
| C | 4.948066 | 5.37305  | 1.222732 |
| H | 4.296951 | 5.93393  | 1.901023 |
| H | 5.555103 | 4.701209 | 1.836911 |
| N | 5.855438 | 6.317141 | 0.575118 |

|   |          |          |          |
|---|----------|----------|----------|
| C | 5.51543  | 7.5321   | 0.015069 |
| C | 7.183363 | 6.129186 | 0.321416 |
| C | 6.67246  | 8.019614 | -0.54353 |
| H | 4.510744 | 7.92248  | 0.074135 |
| H | 7.703574 | 5.24135  | 0.656339 |
| H | 6.812538 | 8.956206 | -1.06655 |
| N | 7.714506 | 7.136923 | -0.34775 |
| C | -3.29999 | -1.05021 | 2.103635 |
| C | -3.64506 | -2.08602 | 2.93451  |
| C | -4.99546 | -1.84873 | 3.343474 |
| H | -2.99976 | -2.90469 | 3.214244 |
| C | -5.3811  | -0.69109 | 2.737248 |
| H | -5.5973  | -2.45951 | 4.001247 |
| H | -6.29328 | -0.11486 | 2.73523  |
| C | -2.35676 | 1.541362 | 0.270316 |
| C | -3.64371 | 1.798107 | -0.12284 |
| C | -3.73787 | 3.208608 | -0.34323 |
| H | -4.42417 | 1.062052 | -0.23111 |
| C | -2.50386 | 3.720892 | -0.07864 |
| H | -4.60836 | 3.762756 | -0.66374 |
| H | -2.08476 | 4.714721 | -0.11236 |
| O | -4.3601  | -0.19154 | 1.976724 |
| O | -1.64893 | 2.727275 | 0.299998 |
| N | 8.906456 | -5.73606 | 0.228464 |
| C | 9.563456 | -5.87898 | -1.02418 |
| C | 9.581615 | -4.81828 | -1.9441  |
| C | 10.20789 | -7.08219 | -1.35316 |
| C | 10.22367 | -4.96657 | -3.17265 |
| H | 9.089867 | -3.88504 | -1.69036 |
| C | 10.86391 | -7.21469 | -2.57615 |
| H | 10.19312 | -7.90445 | -0.6455  |
| C | 10.87251 | -6.16178 | -3.49527 |
| H | 10.22863 | -4.13718 | -3.87413 |
| H | 11.35886 | -8.15144 | -2.81591 |
| H | 11.37827 | -6.27094 | -4.44971 |
| C | 9.525491 | -6.23633 | 1.40657  |
| C | 8.770625 | -6.92399 | 2.370356 |
| C | 10.90141 | -6.05264 | 1.617038 |
| C | 9.38226  | -7.40672 | 3.526382 |



|   |          |          |          |
|---|----------|----------|----------|
| H | 7.708329 | -7.07294 | 2.20762  |
| C | 11.5081  | -6.55573 | 2.767029 |
| H | 11.48667 | -5.51948 | 0.875206 |
| C | 10.75371 | -7.23061 | 3.730828 |
| H | 8.784854 | -7.93603 | 4.263211 |
| H | 12.57379 | -6.40648 | 2.915342 |
| H | 11.22814 | -7.61468 | 4.628647 |
| C | -1.55697 | -0.62279 | -0.52934 |
| C | -0.99962 | 0.648435 | -0.57666 |
| N | 0.379127 | 0.454668 | -0.58316 |
| N | -0.55596 | -1.56958 | -0.48048 |
| C | 0.588703 | -0.90289 | -0.50883 |
| C | 1.909588 | -1.54903 | -0.45208 |
| C | 2.961952 | -1.19029 | -1.31002 |
| C | 2.11528  | -2.59671 | 0.460196 |
| C | 4.190863 | -1.8392  | -1.23449 |
| H | 2.813259 | -0.41716 | -2.05707 |
| C | 3.342796 | -3.24627 | 0.530196 |
| H | 1.298086 | -2.89722 | 1.107445 |
| C | 4.408642 | -2.8757  | -0.30995 |
| H | 4.995025 | -1.52907 | -1.89427 |
| H | 3.471395 | -4.06524 | 1.231024 |
| C | 1.349194 | 1.521871 | -0.31243 |
| C | 1.489262 | 1.795281 | 1.188408 |
| H | 1.011574 | 2.417789 | -0.83859 |
| H | 2.310686 | 1.236503 | -0.73741 |
| C | 2.488663 | 2.919521 | 1.475132 |
| H | 0.504331 | 2.055671 | 1.59374  |
| H | 1.807603 | 0.870797 | 1.686484 |
| C | 2.646264 | 3.202818 | 2.973266 |
| H | 3.467299 | 2.658065 | 1.049627 |
| H | 2.164049 | 3.835997 | 0.963432 |
| H | 1.667223 | 3.462964 | 3.39882  |
| H | 2.970098 | 2.285388 | 3.483863 |
| C | 3.645009 | 4.32797  | 3.262264 |
| H | 3.322737 | 5.251224 | 2.764588 |
| H | 4.629013 | 4.073694 | 2.848978 |
| C | 5.718745 | -3.56316 | -0.22795 |
| C | 6.479498 | -3.81546 | -1.38471 |

|   |          |          |          |
|---|----------|----------|----------|
| C | 6.238401 | -3.98374 | 1.010434 |
| C | 7.707885 | -4.461   | -1.30817 |
| H | 6.090869 | -3.52606 | -2.35607 |
| C | 7.465889 | -4.63057 | 1.09064  |
| H | 5.684504 | -3.77932 | 1.921377 |
| C | 8.219141 | -4.87887 | -0.0685  |
| H | 8.280032 | -4.6574  | -2.20751 |
| H | 7.858788 | -4.94232 | 2.051463 |
| C | 3.794264 | 4.59541  | 4.763952 |
| H | 2.83003  | 4.872443 | 5.202362 |
| H | 4.138605 | 3.694328 | 5.280253 |
| N | 4.751071 | 5.660831 | 5.052668 |
| C | 4.537853 | 7.017364 | 4.91194  |
| C | 6.056323 | 5.507912 | 5.421786 |
| C | 5.737206 | 7.614846 | 5.216698 |
| H | 3.576275 | 7.413198 | 4.622296 |
| H | 6.484475 | 4.529686 | 5.597231 |
| H | 5.966559 | 8.672    | 5.230204 |
| N | 6.684686 | 6.664348 | 5.536285 |
| C | 9.526173 | -5.56899 | 0.014607 |
| N | 9.958284 | -5.95354 | 1.226241 |
| C | 11.14723 | -6.57605 | 1.253645 |
| C | 11.38324 | -6.40101 | -1.00339 |
| N | 11.89368 | -6.82108 | 0.165063 |
| N | 10.20422 | -5.77115 | -1.12642 |
| C | 11.66846 | -7.02113 | 2.56826  |
| C | 10.92829 | -6.79246 | 3.740279 |
| C | 12.908   | -7.67656 | 2.655985 |
| C | 11.41985 | -7.21138 | 4.974818 |
| H | 9.972137 | -6.28701 | 3.668541 |
| C | 13.39618 | -8.09404 | 3.892362 |
| H | 13.47606 | -7.85131 | 1.749576 |
| C | 12.6543  | -7.86299 | 5.054695 |
| H | 10.84072 | -7.0303  | 5.875421 |
| H | 14.35535 | -8.59987 | 3.950447 |
| H | 13.03625 | -8.18898 | 6.017813 |
| C | 12.17095 | -6.64814 | -2.23486 |
| C | 11.68865 | -6.22265 | -3.48393 |
| C | 13.40802 | -7.31052 | -2.16603 |

|   |          |          |          |
|---|----------|----------|----------|
| C | 12.43017 | -6.45588 | -4.64019 |
| H | 10.73404 | -5.71165 | -3.53311 |
| C | 14.14648 | -7.54217 | -3.32458 |
| H | 13.77707 | -7.63726 | -1.20071 |
| C | 13.66032 | -7.11602 | -4.56427 |
| H | 12.04933 | -6.12327 | -5.60123 |
| H | 15.10151 | -8.05523 | -3.26167 |
| H | 14.23718 | -7.29735 | -5.46654 |
| C | -2.95182 | -1.03535 | -0.56529 |
| C | -3.4112  | -2.33404 | -0.56954 |
| S | -4.30064 | 0.088368 | -0.63324 |
| C | -4.83158 | -2.43563 | -0.62848 |
| H | -2.73424 | -3.17869 | -0.53765 |
| C | -5.44993 | -1.21598 | -0.67144 |
| H | -5.36828 | -3.37762 | -0.6402  |
| H | -6.50832 | -0.99789 | -0.71808 |
| C | -1.61486 | 1.970653 | -0.61377 |
| C | -2.21741 | 2.652844 | 0.41665  |
| S | -1.70818 | 2.904777 | -2.09999 |
| C | -2.75071 | 3.917395 | 0.027414 |
| H | -2.27693 | 2.248122 | 1.420303 |
| C | -2.54694 | 4.192209 | -1.29837 |
| H | -3.25933 | 4.593104 | 0.705093 |
| H | -2.83888 | 5.075432 | -1.85069 |

Computational ground state geometry of **ThAm** using B3LYP/6-31G (d,p) basis set of Gaussian

09 program set.

|   |          |          |          |
|---|----------|----------|----------|
| C | -1.96055 | -0.68599 | 0.796367 |
| C | -1.45619 | 0.468361 | 0.212145 |
| N | -0.1309  | 0.181204 | -0.10438 |
| N | -0.97249 | -1.64577 | 0.863078 |
| C | 0.110361 | -1.10347 | 0.325294 |
| C | 1.406088 | -1.79285 | 0.224136 |
| C | 2.177125 | -1.78178 | -0.94979 |
| C | 1.874937 | -2.52821 | 1.324787 |
| C | 3.390755 | -2.46025 | -1.0085  |

|   |          |          |          |
|---|----------|----------|----------|
| H | 1.806596 | -1.27592 | -1.83591 |
| C | 3.087323 | -3.20668 | 1.261869 |
| H | 1.281791 | -2.54937 | 2.233113 |
| C | 3.876558 | -3.18211 | 0.096888 |
| H | 3.95199  | -2.46126 | -1.93777 |
| H | 3.442386 | -3.73982 | 2.138491 |
| C | 0.862266 | 1.2066   | -0.44348 |
| C | 1.417316 | 1.894753 | 0.807659 |
| H | 0.377906 | 1.932248 | -1.10099 |
| H | 1.667789 | 0.740094 | -1.00928 |
| C | 2.439004 | 2.980966 | 0.459642 |
| H | 0.583236 | 2.330264 | 1.37063  |
| H | 1.877932 | 1.135273 | 1.451909 |
| C | 3.010888 | 3.674635 | 1.7012   |
| H | 3.260684 | 2.53979  | -0.12117 |
| H | 1.967848 | 3.730163 | -0.19145 |
| H | 2.18845  | 4.110601 | 2.284993 |
| H | 3.485175 | 2.925008 | 2.349525 |
| C | 4.026929 | 4.767513 | 1.354503 |
| H | 3.556279 | 5.526551 | 0.717091 |
| H | 4.856905 | 4.341375 | 0.777201 |
| C | 5.17145  | -3.8983  | 0.032837 |
| C | 6.263125 | -3.36955 | -0.67886 |
| C | 5.356524 | -5.13271 | 0.68086  |
| C | 7.478463 | -4.04121 | -0.7494  |
| H | 6.16456  | -2.41027 | -1.17816 |
| C | 6.572732 | -5.80444 | 0.63005  |
| H | 4.531705 | -5.58244 | 1.225317 |
| C | 7.654263 | -5.27025 | -0.09101 |
| H | 8.303358 | -3.61125 | -1.30714 |
| H | 6.688175 | -6.75449 | 1.140387 |
| C | 4.593521 | 5.447806 | 2.605531 |
| H | 3.788362 | 5.89624  | 3.196684 |
| H | 5.096705 | 4.715945 | 3.244514 |
| N | 5.563059 | 6.492626 | 2.28577  |
| C | 5.281382 | 7.758056 | 1.811639 |
| C | 6.923008 | 6.378422 | 2.307373 |
| C | 6.501113 | 8.347142 | 1.579998 |
| H | 4.266469 | 8.106765 | 1.694669 |

|   |          |          |          |
|---|----------|----------|----------|
| H | 7.409632 | 5.471327 | 2.641017 |
| H | 6.695776 | 9.346223 | 1.213515 |
| N | 7.52614  | 7.478468 | 1.893244 |
| C | -3.30419 | -0.98759 | 1.26607  |
| C | -3.725   | -2.18845 | 1.793656 |
| C | -5.10467 | -2.20171 | 2.150963 |
| H | -3.05036 | -3.02767 | 1.90814  |
| C | -5.73151 | -1.01337 | 1.892887 |
| H | -5.60777 | -3.06091 | 2.580177 |
| H | -6.76528 | -0.74523 | 2.064132 |
| C | -2.07523 | 1.76022  | -0.06308 |
| C | -2.38384 | 2.758105 | 0.830887 |
| C | -3.01859 | 3.885348 | 0.229628 |
| H | -2.16329 | 2.674098 | 1.888689 |
| C | -3.18568 | 3.740331 | -1.12158 |
| H | -3.33238 | 4.765855 | 0.778088 |
| H | -3.62721 | 4.439159 | -1.81947 |
| N | 8.891918 | -5.95441 | -0.15294 |
| C | 8.920957 | -7.37242 | -0.24979 |
| C | 8.029311 | -8.04653 | -1.09969 |
| C | 9.846121 | -8.11558 | 0.500631 |
| C | 8.058466 | -9.43769 | -1.18545 |
| H | 7.316815 | -7.47501 | -1.68524 |
| C | 9.88088  | -9.50518 | 0.393674 |
| H | 10.53438 | -7.59779 | 1.160406 |
| C | 8.985785 | -10.1757 | -0.44457 |
| H | 7.361529 | -9.94476 | -1.84661 |
| H | 10.60302 | -10.0662 | 0.980014 |
| H | 9.010733 | -11.2585 | -0.51968 |
| C | 10.11303 | -5.22746 | -0.11886 |
| C | 10.27668 | -4.15157 | 0.768547 |
| C | 11.17268 | -5.58068 | -0.96962 |
| C | 11.47444 | -3.43866 | 0.79311  |
| H | 9.461985 | -3.87977 | 1.431551 |
| C | 12.37374 | -4.87426 | -0.92434 |
| H | 11.04831 | -6.40966 | -1.65841 |
| C | 12.5316  | -3.79682 | -0.04816 |
| H | 11.58547 | -2.60831 | 1.48463  |
| H | 13.18467 | -5.16017 | -1.58815 |

|   |          |          |          |
|---|----------|----------|----------|
| H | 13.46574 | -3.24428 | -0.02084 |
| S | -4.63834 | 0.154256 | 1.210327 |
| S | -2.58027 | 2.216815 | -1.68396 |
| C | -1.74123 | -0.65156 | -0.75466 |
| C | -1.20936 | 0.634058 | -0.71781 |
| N | 0.172874 | 0.456384 | -0.67235 |
| N | -0.73156 | -1.58419 | -0.7251  |
| C | 0.401916 | -0.89952 | -0.67215 |
| C | 1.730437 | -1.52907 | -0.57614 |
| C | 2.81214  | -1.14287 | -1.38346 |
| C | 1.915411 | -2.58425 | 0.332281 |
| C | 4.049222 | -1.76865 | -1.25919 |
| H | 2.68337  | -0.36596 | -2.12981 |
| C | 3.151378 | -3.21037 | 0.451756 |
| H | 1.076729 | -2.90731 | 0.93996  |
| C | 4.246668 | -2.80855 | -0.33428 |
| H | 4.875753 | -1.43581 | -1.87905 |
| H | 3.264789 | -4.03366 | 1.150138 |
| C | 1.154674 | 1.513959 | -0.41294 |
| C | 1.536209 | 1.594189 | 1.068613 |
| H | 0.716952 | 2.454089 | -0.7539  |
| H | 2.040823 | 1.330361 | -1.02001 |
| C | 2.542678 | 2.715757 | 1.340553 |
| H | 0.629382 | 1.7454   | 1.667512 |
| H | 1.957611 | 0.629583 | 1.376773 |
| C | 2.957093 | 2.794396 | 2.814121 |
| H | 3.436086 | 2.562055 | 0.719869 |
| H | 2.113038 | 3.678164 | 1.029984 |
| H | 2.064535 | 2.951032 | 3.435496 |
| H | 3.381697 | 1.829261 | 3.122926 |
| C | 3.972092 | 3.909234 | 3.085659 |
| H | 3.551652 | 4.878597 | 2.79001  |
| H | 4.871378 | 3.756471 | 2.476029 |
| C | 5.568176 | -3.46422 | -0.19395 |
| C | 6.389505 | -3.68987 | -1.31414 |
| C | 6.039581 | -3.87658 | 1.066231 |
| C | 7.630978 | -4.30044 | -1.18134 |
| H | 6.039353 | -3.4065  | -2.30178 |
| C | 7.280184 | -4.48797 | 1.202679 |

|   |          |          |          |
|---|----------|----------|----------|
| H | 5.437265 | -3.69253 | 1.950389 |
| C | 8.094963 | -4.70818 | 0.080121 |
| H | 8.250637 | -4.47615 | -2.05307 |
| H | 7.635967 | -4.79289 | 2.179972 |
| C | 4.380731 | 3.970705 | 4.561506 |
| H | 3.504675 | 4.140054 | 5.195955 |
| H | 4.8296   | 3.02293  | 4.873604 |
| N | 5.352457 | 5.027327 | 4.831635 |
| C | 5.091148 | 6.37914  | 4.930401 |
| C | 6.705396 | 4.882998 | 4.940825 |
| C | 6.313922 | 6.9813   | 5.105359 |
| H | 4.085698 | 6.767874 | 4.874214 |
| H | 7.176506 | 3.909974 | 4.893671 |
| H | 6.521464 | 8.035304 | 5.233286 |
| N | 7.321537 | 6.038993 | 5.11189  |
| C | 9.417741 | -5.35723 | 0.224305 |
| N | 9.805583 | -5.72729 | 1.455268 |
| C | 11.01158 | -6.31086 | 1.538589 |
| C | 11.34543 | -6.12954 | -0.70562 |
| N | 11.815   | -6.53178 | 0.486008 |
| N | 10.15361 | -5.53804 | -0.88393 |
| C | 11.48587 | -6.73815 | 2.876652 |
| C | 10.68692 | -6.53011 | 4.013383 |
| C | 12.73929 | -7.35579 | 3.022136 |
| C | 11.13458 | -6.93201 | 5.270077 |
| H | 9.720244 | -6.05385 | 3.897017 |
| C | 13.18347 | -7.75633 | 4.280506 |
| H | 13.35251 | -7.51508 | 2.142721 |
| C | 12.38327 | -7.54581 | 5.4075   |
| H | 10.51022 | -6.76701 | 6.143127 |
| H | 14.1538  | -8.23293 | 4.383279 |
| H | 12.73101 | -7.85849 | 6.387835 |
| C | 12.19638 | -6.35233 | -1.89906 |
| C | 11.75722 | -5.94676 | -3.17047 |
| C | 13.45104 | -6.97153 | -1.77142 |
| C | 12.55834 | -6.15689 | -4.29083 |
| H | 10.78878 | -5.46936 | -3.26517 |
| C | 14.24922 | -7.18007 | -2.8942  |
| H | 13.78657 | -7.28329 | -0.78907 |

|   |          |          |          |
|---|----------|----------|----------|
| C | 13.80581 | -6.77377 | -4.15638 |
| H | 12.21047 | -5.83998 | -5.26952 |
| H | 15.21749 | -7.65962 | -2.78586 |
| H | 14.4292  | -6.93703 | -5.03072 |
| C | -3.1218  | -1.08229 | -0.78173 |
| C | -3.68438 | -2.32342 | -0.93244 |
| C | -5.10121 | -2.14092 | -0.84186 |
| H | -3.142   | -3.24353 | -1.08907 |
| C | -5.30245 | -0.80799 | -0.6414  |
| H | -5.86562 | -2.90104 | -0.91791 |
| H | -6.1822  | -0.19597 | -0.51564 |
| C | -1.85008 | 1.934359 | -0.76004 |
| C | -1.75441 | 3.067336 | 0.006897 |
| C | -2.66923 | 4.019327 | -0.54632 |
| H | -1.127   | 3.194464 | 0.876976 |
| C | -3.26124 | 3.400954 | -1.6066  |
| H | -2.86367 | 5.02185  | -0.19351 |
| H | -4.01171 | 3.705072 | -2.32014 |
| O | -4.1071  | -0.14765 | -0.59975 |
| O | -2.7716  | 2.139514 | -1.75906 |



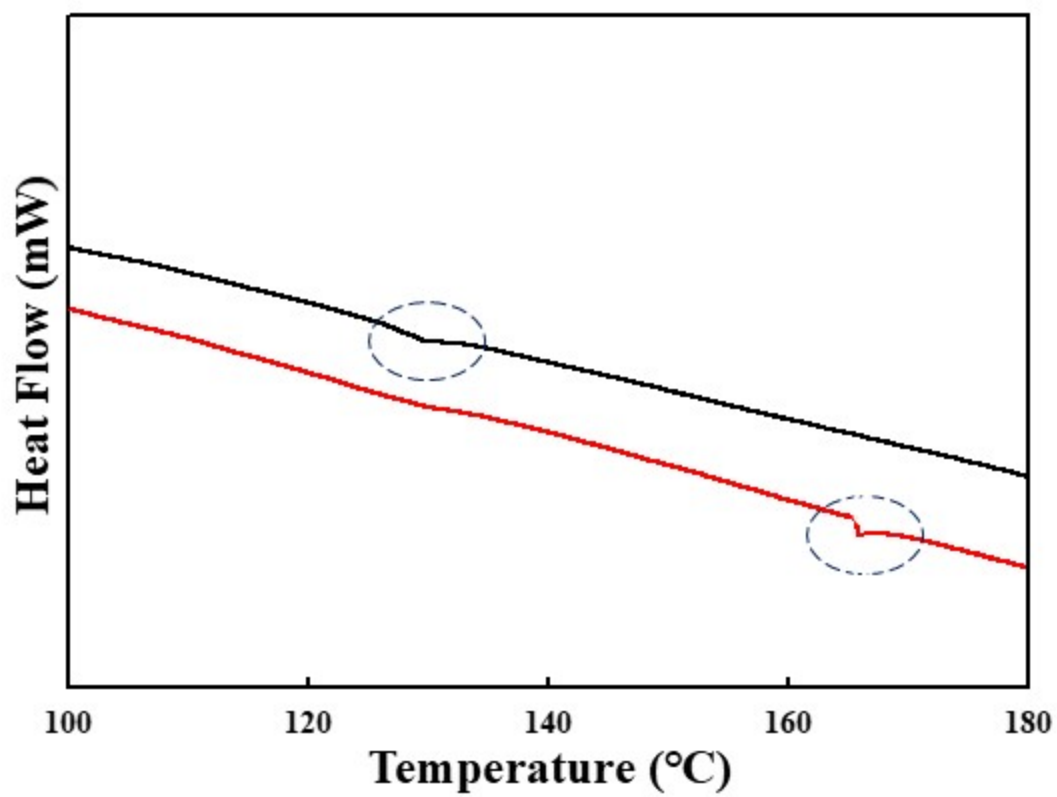

**Fig. S6.** DSC thermograms of target compounds **ThAm** (red) and **FuAm** (black).

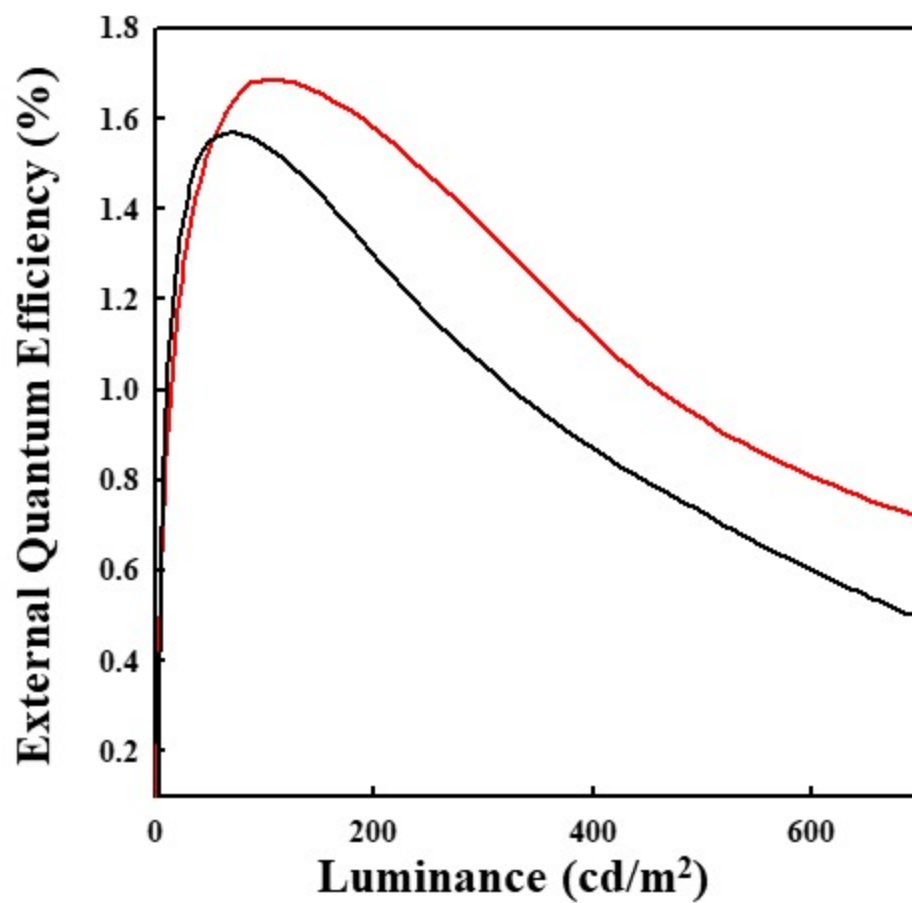

**Fig S7.** Luminescence vs EQE plot for **ThAm** (red) and **FuAm** (black) LECs

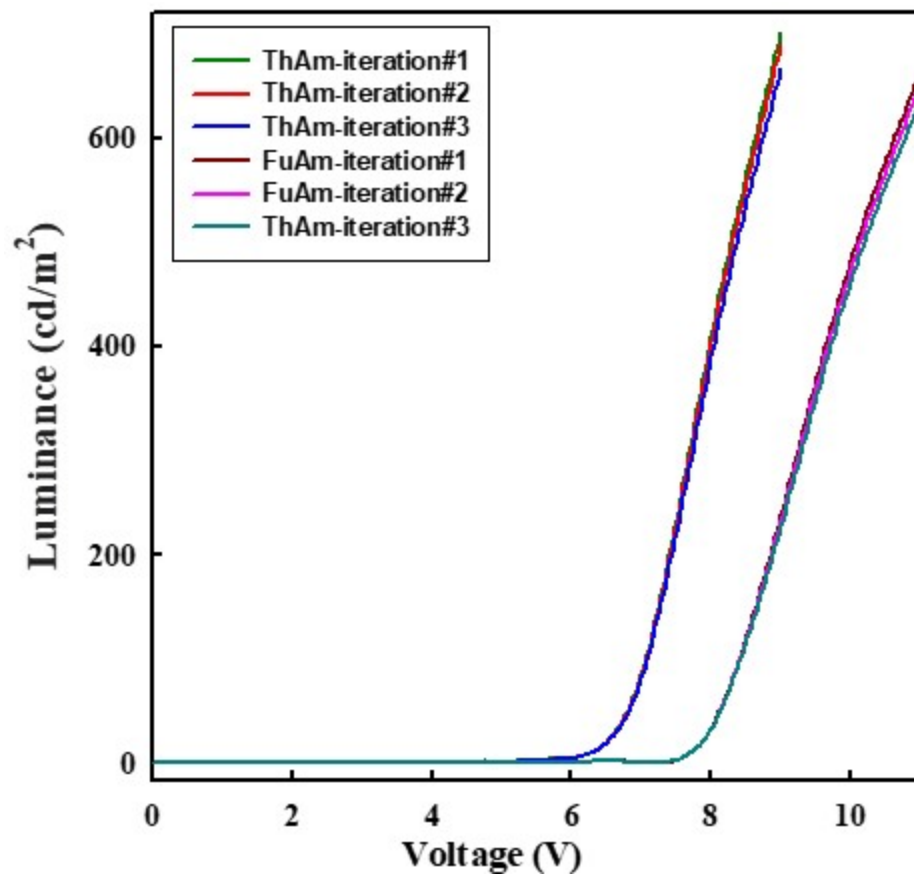

**Fig S8.** Luminescence vs Voltage of **ThAm** and **FuAm** (repetitive scan).

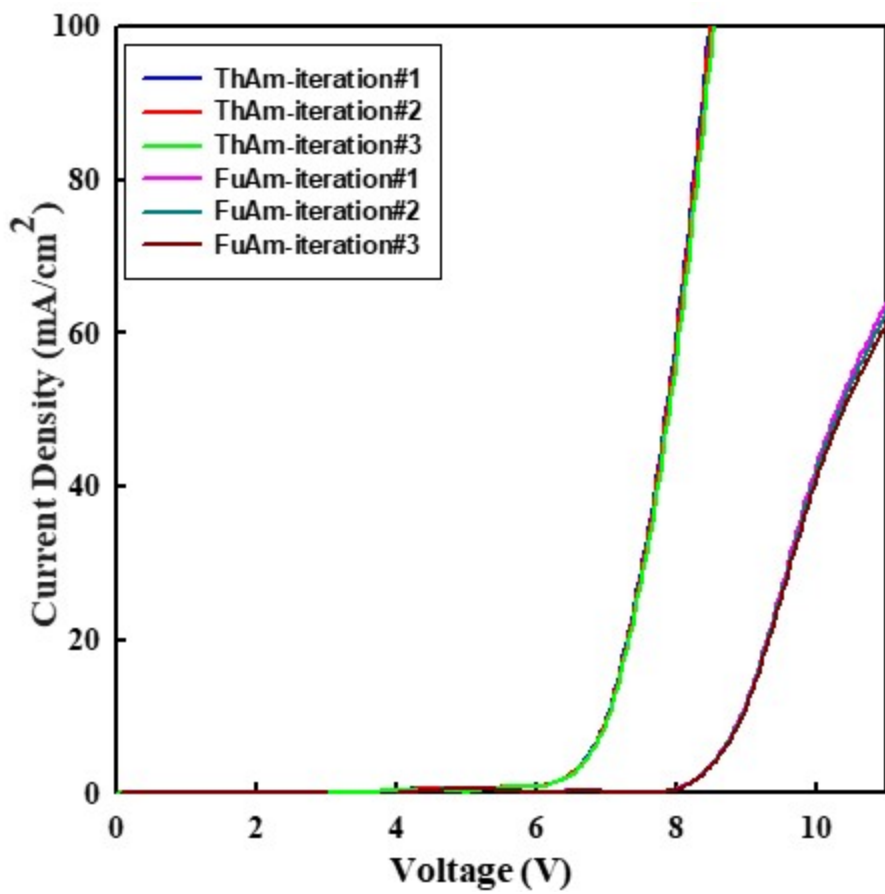

**Fig S9.** Current Density vs Voltage of **ThAm** and **FuAm** (repetitive scan).
